# Supplementary material for: An integrin-targeting nanosystem as a carrier of the selenadiazole derivative to induce ROS-mediated apoptosis in bladder cancer cells, from rational design to action mechanisms
Source: Royal Society of Chemistry journal article supplement (doi:10.1039/c5tb01929j), 2015-01-01
Supplement: c5tb01929j1.pdf [file c5tb01929j1.pdf]

SUPPLEMENTARY INFORMATION

for

**An integrin-targeting nanosystem as the carrier of a selenadiazole derivative to induce ROS-mediated apoptosis in bladder cancer cells: from rational design to action mechanisms**

*Yifan Wang<sup>a</sup>, Wenying Li<sup>a</sup>, Yahui Yang<sup>a</sup>, Qinsong Zeng<sup>b</sup>, Ka-Hing Wong<sup>c,d</sup>,  
Tianfeng Chen<sup>a\*</sup>*

<sup>a</sup> Department of Chemistry, Jinan University, Guangzhou 510632, China

<sup>b</sup> Department of Urology, General Hospital of Guangzhou Military Command of  
PLA, Guangzhou 510010, China

<sup>c</sup> Department of Applied Biology and Chemical Technology, The Hong Kong  
Polytechnic University, Hunghom, Kowloon, Hong Kong

<sup>d</sup> Shenzhen Key Laboratory of Food Biological Safety Control, Food Safety and  
Technology Research Centre, PolyU Shenzhen Research Institute, Shenzhen, PR  
China

CORRESPONDING AUTHORS

\*Tianfeng Chen, [tchentf@jnu.edu.cn](mailto:tchentf@jnu.edu.cn);

Tel: +86 20-85225962; Fax: +86 20 85221263;

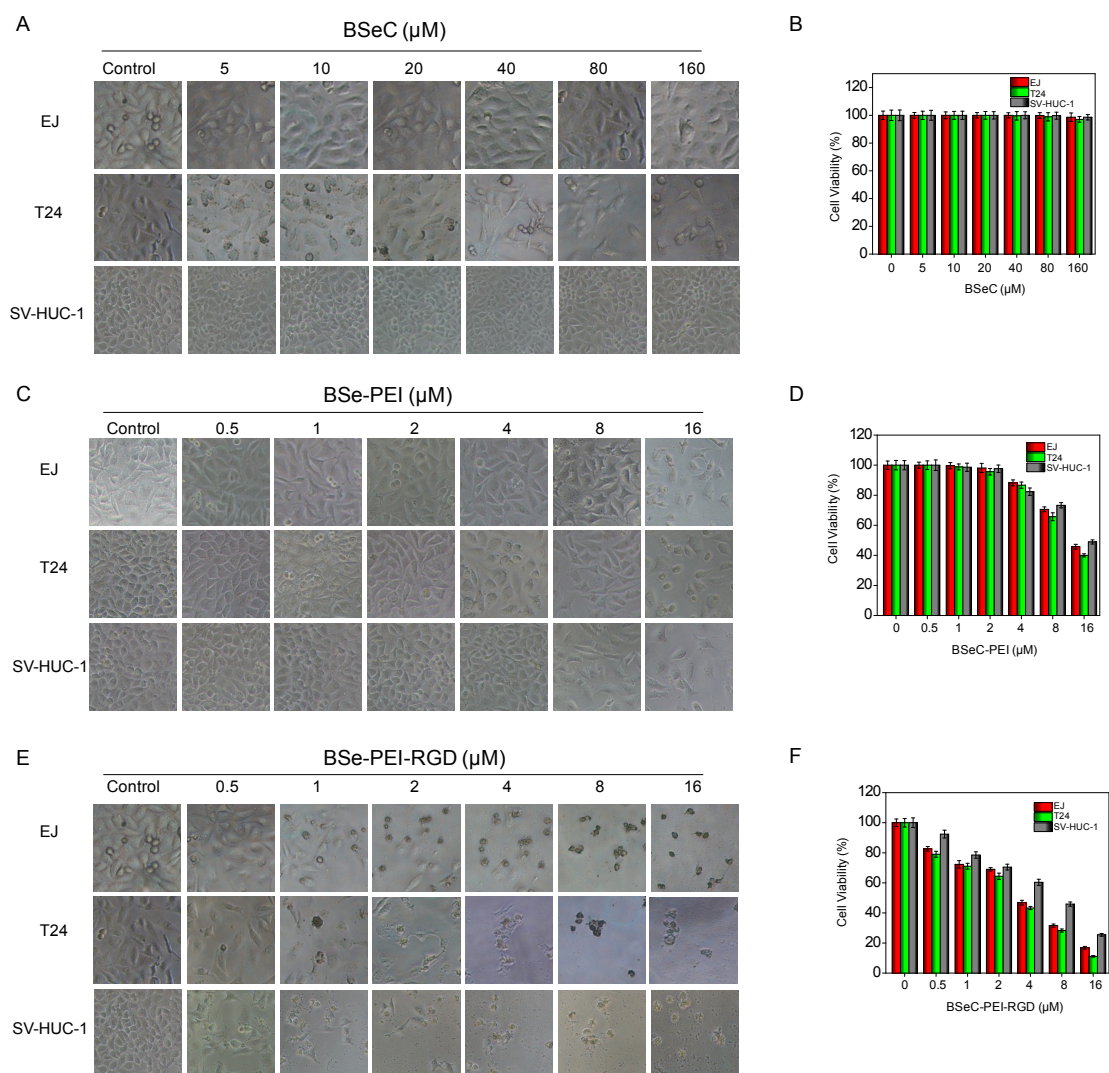

**Figure S1.** The cell picture of EJ, T24 and SV-HUC-1 treated with BSeC (A), BSeC-PEI (C) and BSeC-PEI-RGD (E) and cell viability of BSeC (B), BSeC-PEI (D) and BSeC-PEI-RGD (F) against on EJ, T24 and SV-HUC-1 cells , which was measured by MTT assay (72 h).

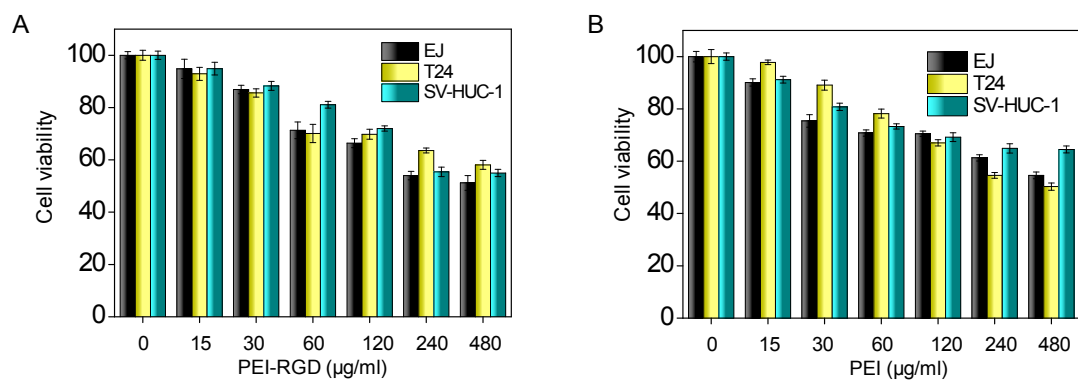

**Figure S2.** Cell viability of PEI-RGD (A) and PEI (B) against on EJ, T24 and SV-HUC-1 cells , which was measured by MTT assay (72 h).

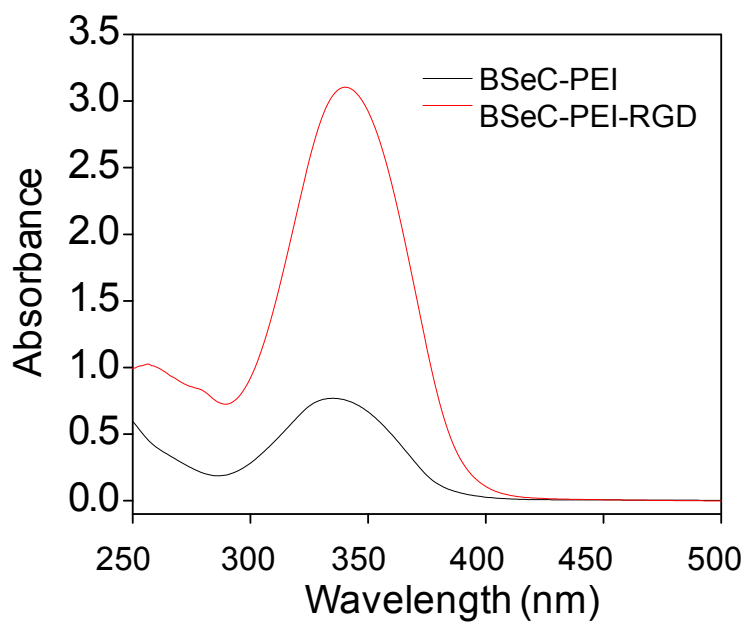

**Figure S3.** The UV-vis spectra of BSeC-PEI and BSeC-PEI-RGD with the maximum of the peak of absorbance at 335 nm and 340 nm.

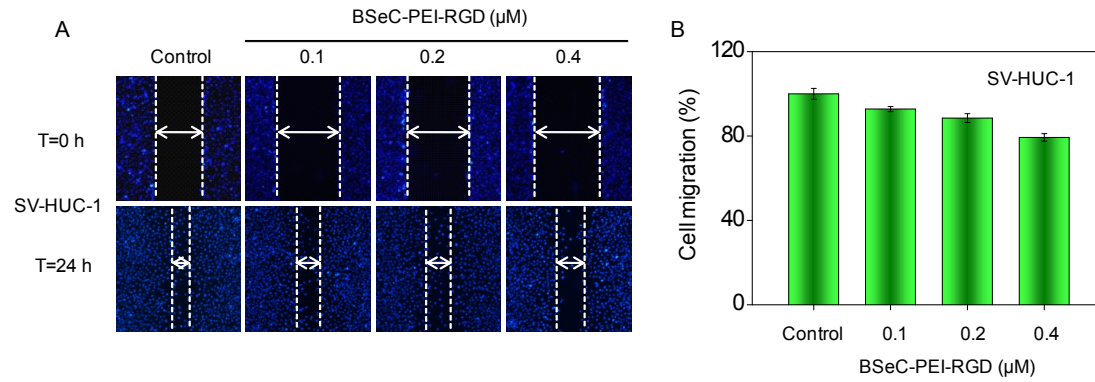

**Figure S4.** Effects of BSeC-PEI-RGD on SV-HUC-1 normal bladder cells migration.

(A) The images of SV-HUC-1 cells wound healing assay were acquired at 0 and 24 h after wounding. (B) Results were expressed as percentages of the fluorescence intensity of control EJ cells with different characters are statistically different at  $*P<0.05$ ,  $**P<0.01$ .

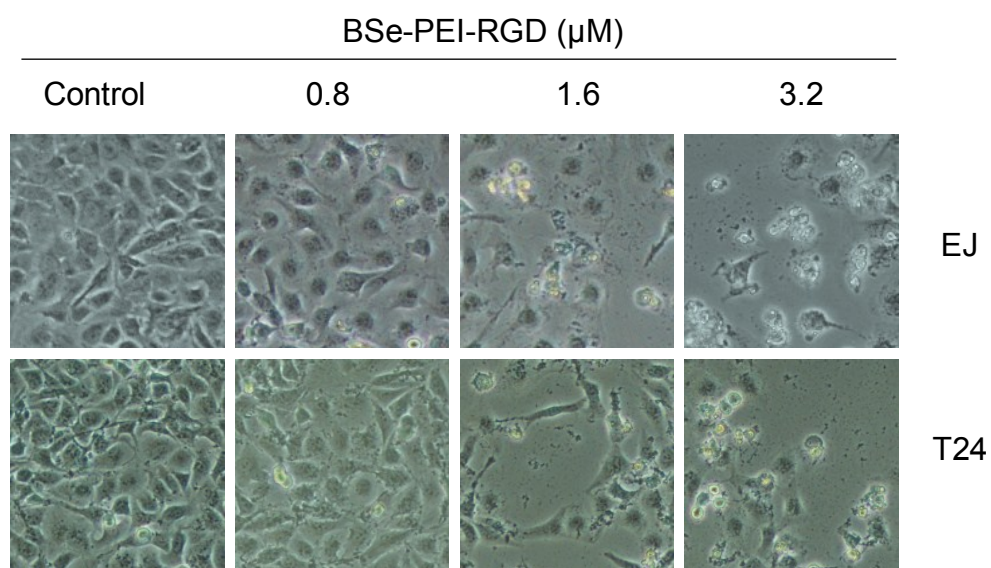

**Figure S5.** The cell picture of EJ, T24 and SV-HUC-1 treated with different concentration BSeC-PEI-RGD analyzed by flow cytometry.
